# Supplementary material for: Personalized surgical informed consent with stereoscopic visualization in neurosurgery—real benefit for the patient or unnecessary gimmick?
Source: Springer Nature journal article supplement (doi:10.1007/s00701-023-05512-x), 2023-02-28
Supplement: MOESM2 [file 701_2023_5512_MOESM2_ESM.pdf]

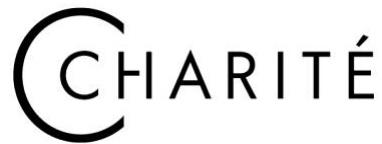

## CharitéCentrum für Neurologie, Neurochirurgie und Psychiatrie

Charité | Campus Mitte | 10117 Berlin

### Neurochirurgische Klinik und Hochschulambulanz

Direktor: Prof. Dr. med. Peter Vajkoczy

Tel. (030) 450 560002

Fax (030) 450-560900

<http://neurochirurgie.charite.de>

Datum: 01.06.2018

## Surgical Informed Consent Study

Questionnaire: mono / stereo

Name:

Date:

Previous Surgeries:

Occupation:

1. Please indicate the location of your tumor (most applicable please mark with a cross, 3 crosses!):

☐ right

☐ front

☐ superficial

☐ left

☐ central

☐ deep

☐ back

2. Please indicate the height of your tumor in relation to the nose-ear line (most likely to apply please tick):

☐ above

☐ at the level of the nose-ear line

☐ below

3. Please name one or more important brain structures that are located near the tumor:

---

---

CHARITÉ - UNIVERSITÄTSMEDIZIN BERLIN

Gliedkörperschaft der Freien Universität Berlin und der Humboldt-Universität zu Berlin

Charitéplatz 1 | 10117 Berlin | Telefon +49 30 450-660 423 | [www.charite.de](http://www.charite.de)

4. Please describe the necessary steps of the intervention in your own words:

---

---

---

5. Please name the risks involved in your procedure:

---

---

---

6. Please answer the following questions on a scale from 1 (strongly disagree) to 5 (strongly agree):

- a. Would you like to know the basics of what exactly happens during your procedure?

1                      2                      3                      4                      5

- b. After being informed, can you clearly imagine what will be done during your procedure?

1                      2                      3                      4                      5

- c. Can you assess the possible complications of your procedure in terms of their importance and likelihood?

1                      2                      3                      4                      5

d. Do you find this type of information confidence-building?

1                      2                      3                      4                      5

e. Does this type of information convey the department's expertise?

1                      2                      3                      4                      5

f. Did this type of information strengthen your consent to the procedure?

1                      2                      3                      4                      5

g. Do you think a 3D representation would have been helpful in your understanding of the procedure? / *Did you find the 3D representation helpful in your understanding of the process?*

1                      2                      3                      4                      5

h. Do you think a 3D representation would have increased your anxiety about the procedure? / *Did you find the 3D representation increased your anxiety about the procedure?*

1                      2                      3                      4                      5
